# Supplementary material for: Ceftriaxone Mediated Synthesized Gold Nanoparticles: A Nano-Therapeutic Tool to Target Bacterial Resistance
Source: MDPI journal article supplement (doi:10.3390/pharmaceutics13111896), 2021-11-08
Supplement: s1 [file s1]

# Supplementary Materials: Ceftriaxone Mediated Synthesized Gold Nanoparticles: A Nano-Therapeutic Tool to Target Bacterial Resistance

Farhan Alshammari, Bushra Alshammari, Afrasim Moin, Abdulwahab Alamri, Turki Al Hagbani, Ahmed Alobaida, Abu Baker, Salman Khan and Syed Mohd Danish Rizvi

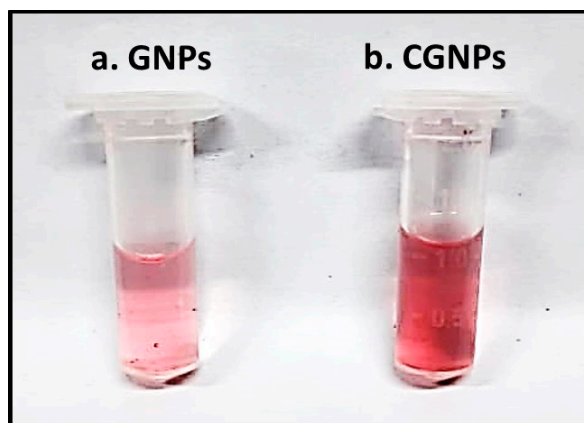

**Figure S1.** Synthesized gold nanoparticles (a) Bromelain mediated synthesized (GNPs) (b) Ceftriaxone mediated synthesized (CGNPs).

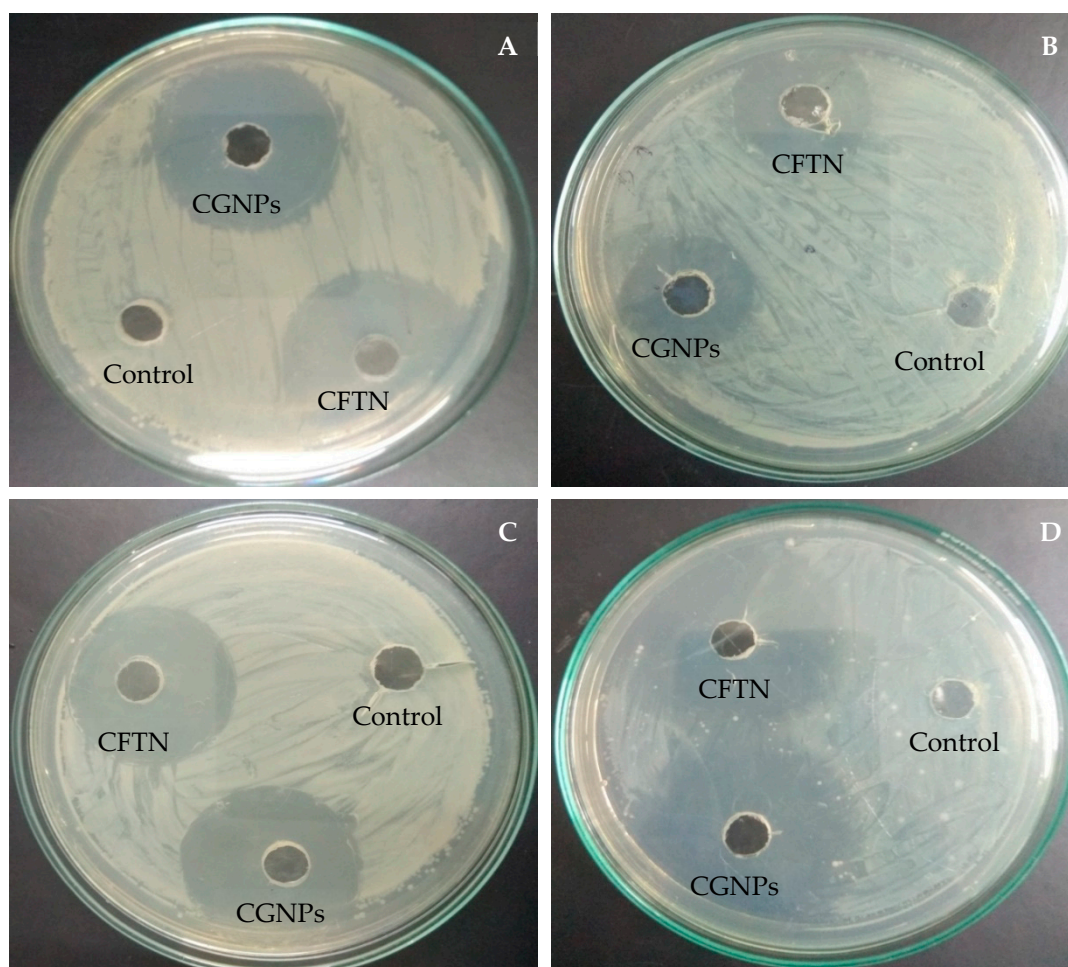

**Figure S2.** Qualitative assessment of the antibacterial activity of CGNPs and ceftriaxone (CFTN). Müller-Hinton (MH) agar plates were seeded with standardized suspensions (equivalent to 0.5 McFarland) of (A) *Escherichia coli* (B) *Staphylococcus aureus*, (C) *Salmonella abony*, and (D) *Klebsiella pneumonia*. The dilutions of CGNPs 50  $\mu$ L (200  $\mu$ g/mL CFTN), CFTN 50  $\mu$ L (1 mg/mL CFTN), and GNP 50  $\mu$ L (negative control) were poured in the wells made in MH plates. After overnight incubation at 37  $^{\circ}$ C, zones of inhibition around wells of CGNPs and CFTN against all tested bacterial species, in comparison to control, were observed.
